# Supplementary material for: Low-dose naltrexone for post-COVID fatigue syndrome: a study protocol for a double-blind, randomised trial in British Columbia
Source: PubMed Central journal article supplement — BMJ Open. 2024 May 13;14(5):e085272. doi: 10.1136/bmjopen-2024-085272 (PMC11097836; doi:10.1136/bmjopen-2024-085272), 2024-05-13
Supplement: bmjopen-2024-085272.reviewer_comments.pdf [file bmjopen-2024-085272.reviewer_comments.pdf]

## PEER REVIEW HISTORY

BMJ Open publishes all reviews undertaken for accepted manuscripts. Reviewers are asked to complete a checklist review form (<http://bmjopen.bmj.com/site/about/resources/checklist.pdf>) and are provided with free text boxes to elaborate on their assessment. These free text comments are reproduced below.

## ARTICLE DETAILS

|                            |                                                                                                                                               |
|----------------------------|-----------------------------------------------------------------------------------------------------------------------------------------------|
| <b>TITLE (PROVISIONAL)</b> | Study protocol for a double-blind, randomised trial of low-dose naltrexone for post-COVID fatigue syndrome in British Columbia                |
| <b>AUTHORS</b>             | Naik, Hiten; Cooke, Erin; Boulter, Travis; Dyer, Roger; Bone, Jeffrey; Tsai, Melody; Cristobal, Jaymie; McKay, R.; Song, Xiaowei; Nacul, Luis |

This article was not externally reviewed at BMJ Open. Protocols that have been independently assessed prior to submission to BMJ Open are usually fast-tracked to publication on the grounds that further substantial changes will not be possible. This independent assessment will usually be external, independent review for both a substantial grant award from a non-commercial or government funder and ethics approval.
